# Supplementary material for: Calcium-intercalated birnessite MnO2 anchored on carbon nanotubes as high-performance cathodes for aqueous zinc-ion batteries
Source: Royal Society of Chemistry journal article supplement (doi:10.1039/d2dt00989g), 2022-01-01
Supplement: d2dt00989g1.pdf [file d2dt00989g1.pdf]

## **Calcium-intercalated birnessite MnO<sub>2</sub> anchored on carbon nanotubes as high-performance cathodes for aqueous zinc-ion batteries**

Weiwei, Wang,<sup>a</sup> Chi, Zhang,<sup>a</sup> Zhengfan, Chen,<sup>a</sup> Rui, Huang,<sup>a</sup> Yanmei, Nie,<sup>a</sup> Penggao, Liu,<sup>a</sup> Kaiyu, Liu,<sup>a, b</sup>

Jun, Yan\*<sup>a, c</sup>

**Corresponding Authors E-mail :** [yanjun@csu.edu.cn](mailto:yanjun@csu.edu.cn)

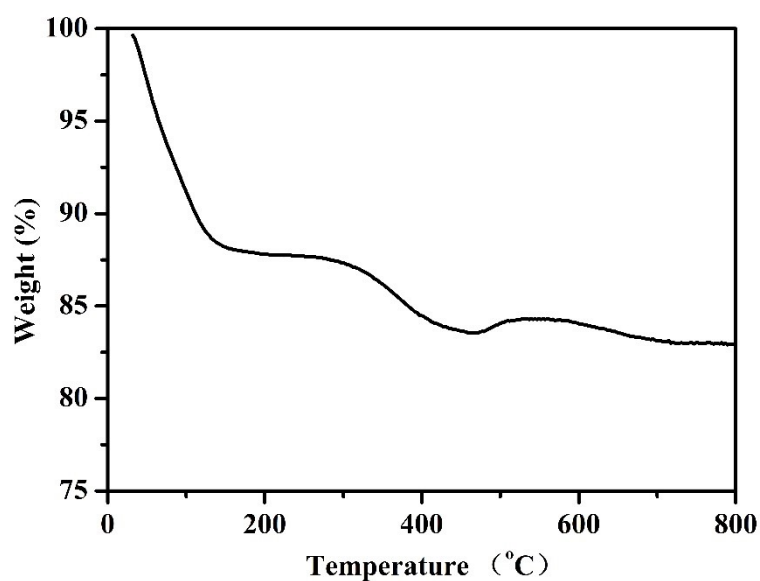

**Figure S1.** TG curves of CNT-CaMnO composite.

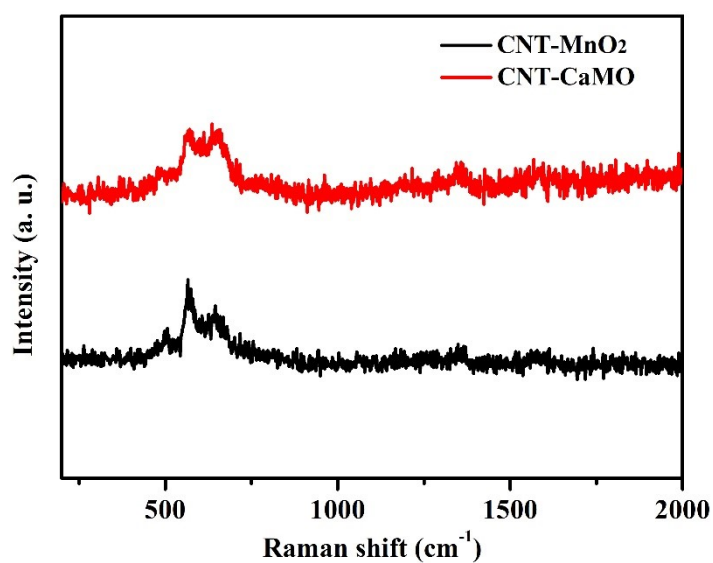

**Figure S2.** Raman spectra of the CNT-MnO<sub>2</sub> and CNT-CaMO samples.

The two peaks at  $\sim 1350$  and  $\sim 1580$   $\text{cm}^{-1}$  correspond to the characteristic D-band and G-band of carbon, respectively, where the former comes from the vibrations of disordered carbon and the latter originates from the in-plane C–C bond stretching vibration of graphitic carbon. The band located at  $\sim 575$  and  $\sim 636$   $\text{cm}^{-1}$  as indicated are in agreement with the in-plane Mn–O stretching vibration of MnO<sub>6</sub> groups at the interlayer direction and out-of-plane Mn–O vibration perpendicular to the layers, respectively.

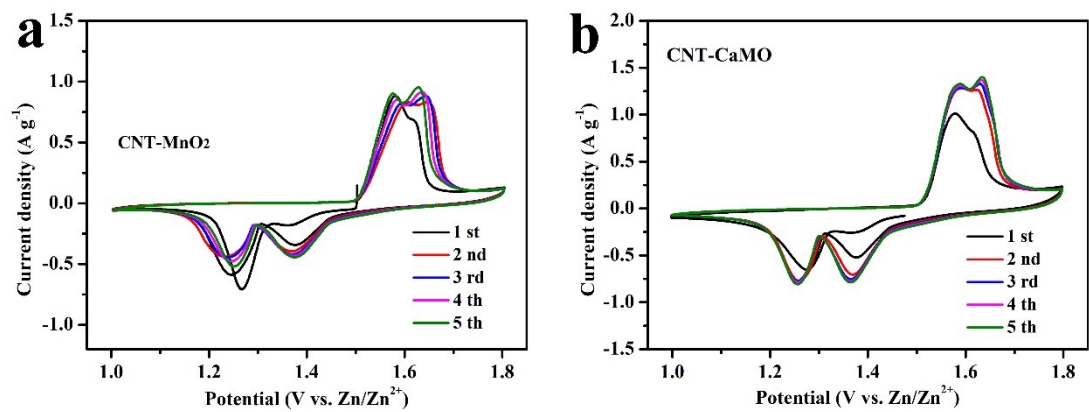

Figure S3. CV curves of the CNT-MnO<sub>2</sub> (a) and CNT-CaMO (b) in initial five cycles.

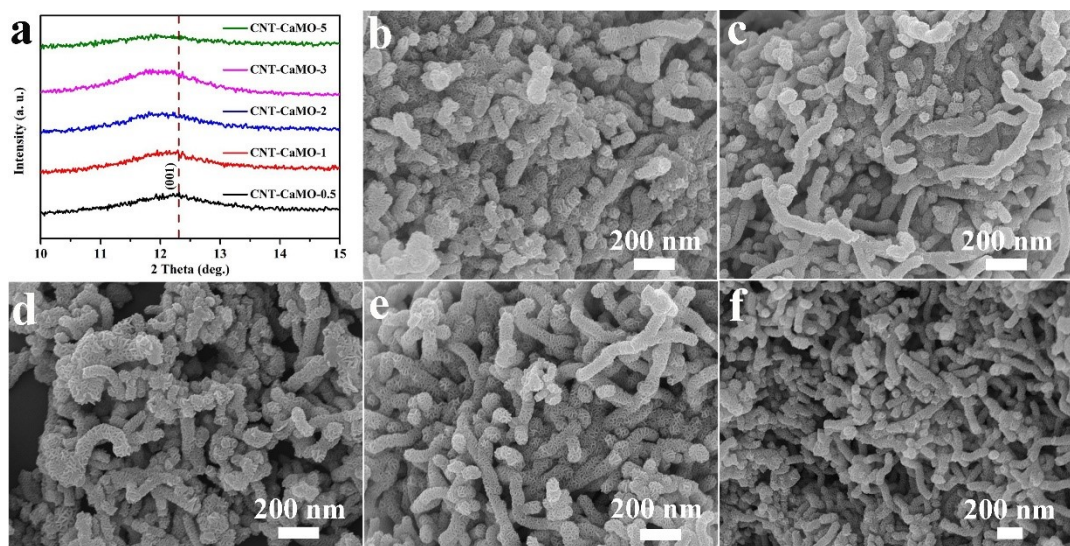

Figure S4. XRD patterns (a), SEM images (b-f) of CNT-CaMO samples with different Ca<sup>2+</sup> contents.

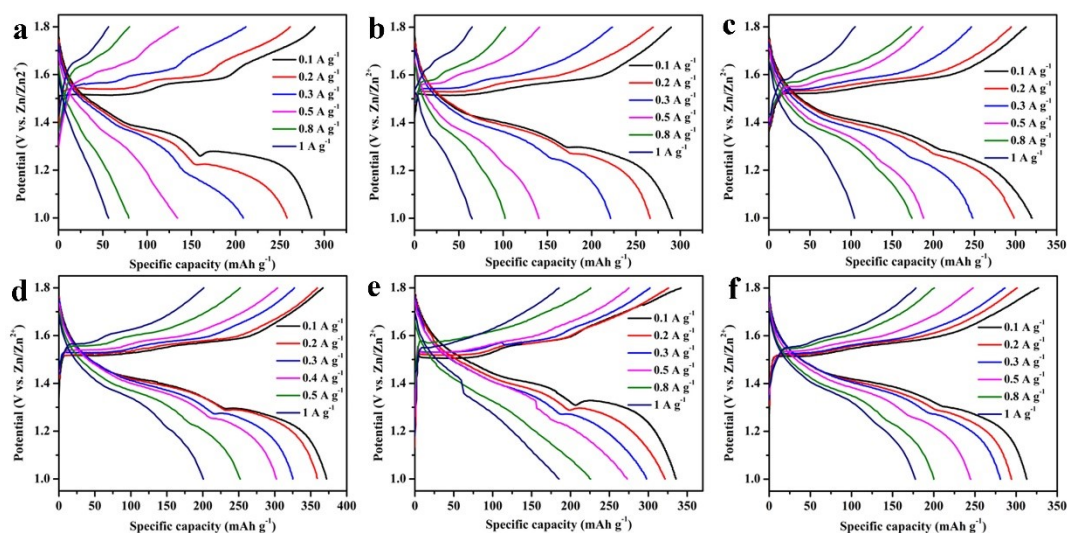

Figure S5. GCD curves of (a) CNT-MnO<sub>2</sub>, (b) CNT-CaMO-0.5, (c) CNT-CaMO-1, (d) CNT-CaMO-2, (e) CNT-CaMO-3, (f) CNT-CaMO-5.

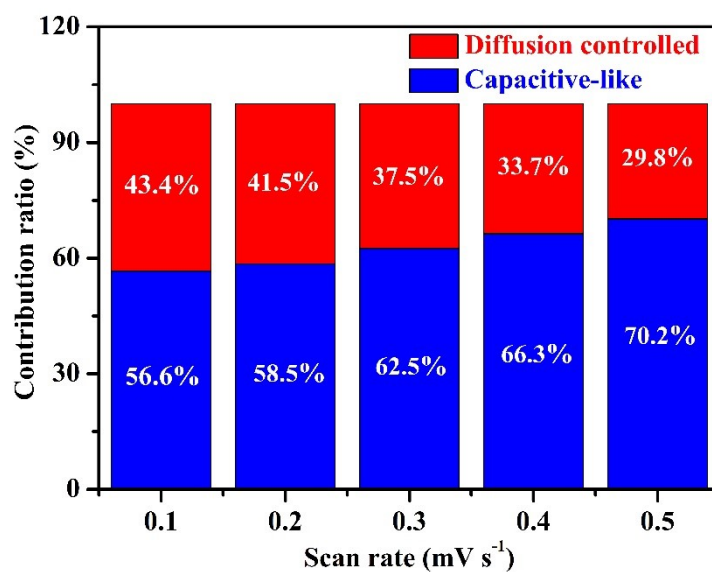

Figure S6. The corresponding percent of pseudocapacitive contribution of CNT-CaMO.

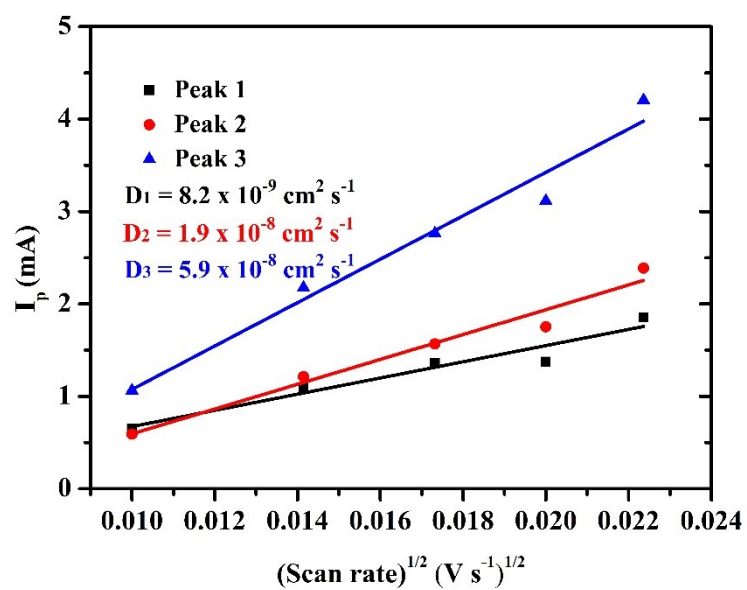

Figure S7. The ions diffusion coefficients of CNT-CaMO by CV measurement.

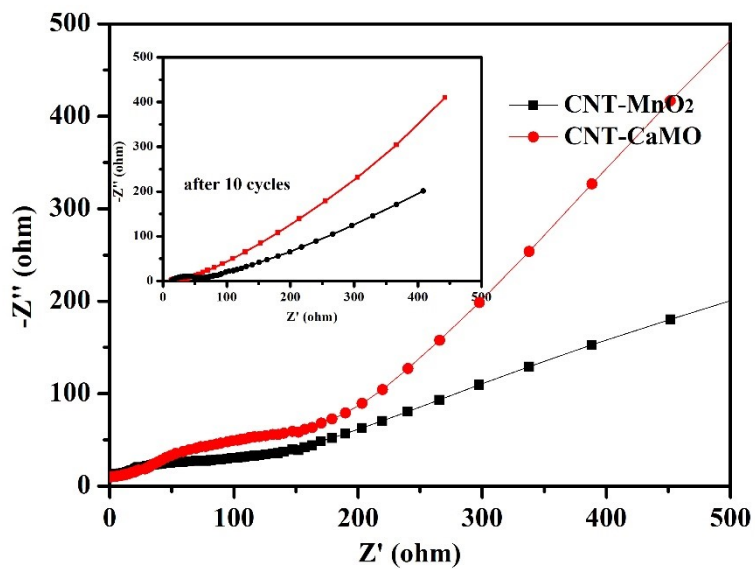

Figure S8. Nyquist plots for CNT-CaMO and CNT-MnO<sub>2</sub> cathodes at initial state and after ten cycles.

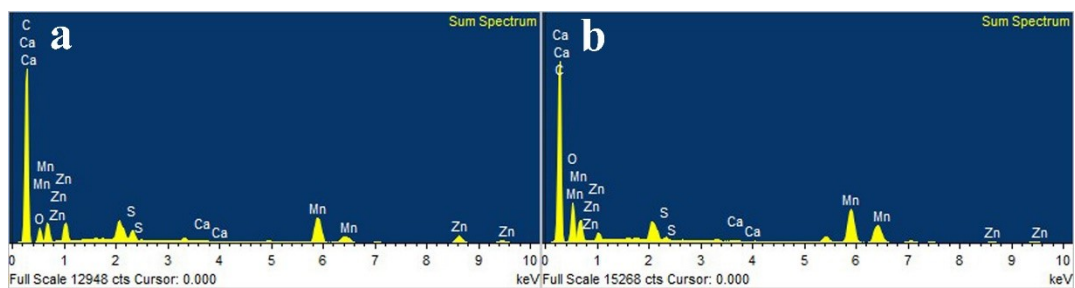

Figure S9. EDS of the fully-discharged (a) and fully-charged electrode (b).

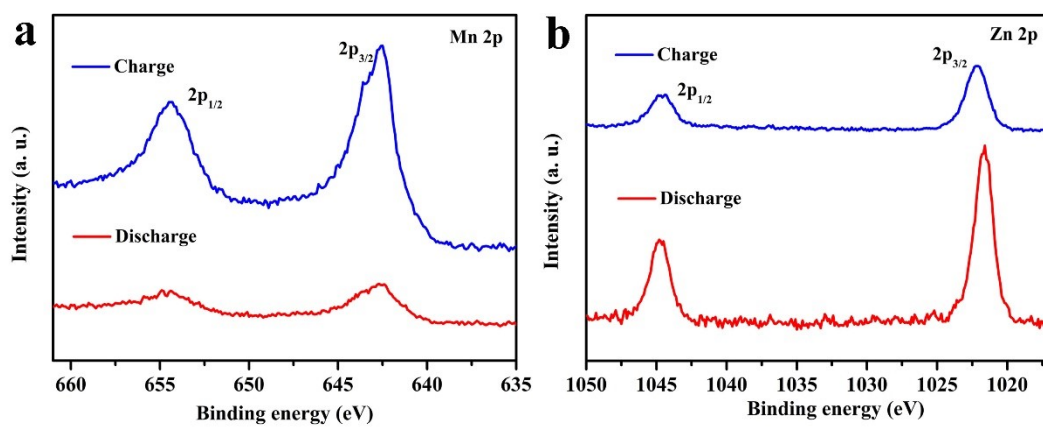

Figure S10. XPS spectra of Mn 2p (a) and Zn 2p (b) at different states.

**Table S1. Comparison of cathode performance in aqueous ZIBs between this work and some recent reported manganese-based oxides.**

| Electrode materials                                      | Electrolyte                                         | Specific capacity                                      | Capacity retention                                                    | Ref.         |
|----------------------------------------------------------|-----------------------------------------------------|--------------------------------------------------------|-----------------------------------------------------------------------|--------------|
| CNT-CaMO                                                 | 2 M ZnSO <sub>4</sub> +<br>0.2 M MnSO <sub>4</sub>  | 351.8 mAh g <sup>-1</sup> at<br>200 mA g <sup>-1</sup> | No obvious<br>capacity fading<br>over 6000 cycles                     | This<br>work |
| δ-MnO <sub>2</sub> @polyaniline                          | 2 M ZnSO <sub>4</sub> +<br>0.2 M MnSO <sub>4</sub>  | 260 mAh g <sup>-1</sup> at<br>50 mA g <sup>-1</sup>    | 94% retained after<br>2000 cycles                                     | S2           |
| Graphene Scroll-Coated<br>α-MnO <sub>2</sub>             | 2 M ZnSO <sub>4</sub> +<br>0.2 M MnSO <sub>4</sub>  | 362 mAh g <sup>-1</sup> at<br>0.3 A g <sup>-1</sup>    | 94% retained after<br>3000 cycles                                     | S3           |
| MnO <sub>2</sub> -birnessite                             | 1 M ZnSO <sub>4</sub> +<br>0.2 M MnSO <sub>4</sub>  | 266 mA h g <sup>-1</sup> at<br>0.1 A g <sup>-1</sup>   | 83.7% capacity<br>retention over 2000<br>cycles                       | S4           |
| K <sub>0.8</sub> Mn <sub>8</sub> O <sub>16</sub>         | 2 M ZnSO <sub>4</sub> + 0.1<br>M MnSO <sub>4</sub>  | 320 mAh g <sup>-1</sup> at<br>100 mA g <sup>-1</sup>   | No obvious<br>capacity fading<br>after 1000 cycles                    | S5           |
| Ca <sub>0.28</sub> MnO <sub>2</sub> ·0.5H <sub>2</sub> O | 1 M ZnSO <sub>4</sub> + 0.1<br>M MnSO <sub>4</sub>  | 277 mAh g <sup>-1</sup> at<br>0.35 A g <sup>-1</sup>   | 92% retained after<br>5000 cycles                                     | S6           |
| Mn-O-3@PPy                                               | 2 M ZnSO <sub>4</sub> +<br>0.2 M MnSO <sub>4</sub>  | 289.8 mAh g <sup>-1</sup> at<br>0.2 A g <sup>-1</sup>  | >100% over 1000<br>cycles                                             | S7           |
| ZnMn <sub>2</sub> O <sub>4</sub> /N-doped<br>graphene    | 1 M ZnSO <sub>4</sub> +<br>0.05 M MnSO <sub>4</sub> | 232 mAh g <sup>-1</sup> at<br>0.1 A g <sup>-1</sup>    | 97.4% over 2500<br>cycles                                             | S8           |
| Zn-stabilized MnO <sub>2</sub>                           | 2 M ZnSO <sub>4</sub> +<br>0.1 M MnSO <sub>4</sub>  | 275 mAh g <sup>-1</sup> at<br>0.3 A g <sup>-1</sup>    | 100% capacity<br>retention over 2000<br>cycles at 3 A g <sup>-1</sup> | S9           |
| La <sup>3+</sup> intercalated δ-<br>MnO <sub>2</sub>     | 1 M ZnSO <sub>4</sub> +<br>0.4 M MnSO <sub>4</sub>  | 278.5 mAh g <sup>-1</sup> at<br>0.1 A g <sup>-1</sup>  | 71% over 200<br>cycles                                                | S10          |

**Table S2. The weight ratio and atomic of the element of full-discharged electrode.**

| Element | Weight% | Atomic% |
|---------|---------|---------|
| C K     | 69.46   | 84.50   |
| O K     | 11.56   | 10.55   |
| S K     | 1.16    | 0.53    |
| Ca K    | 0.12    | 0.04    |
| Mn K    | 9.91    | 2.64    |
| Zn K    | 7.80    | 1.74    |
| Totals  | 100.00  |         |

**Table S3. The weight ratio and atomic of the element of full-charged electrode.**

| Element | Weight% | Atomic% |
|---------|---------|---------|
| C K     | 60.75   | 73.81   |
| O K     | 24.36   | 22.22   |
| S K     | 0.39    | 0.18    |
| Ca K    | 0.13    | 0.05    |
| Mn K    | 12.68   | 3.37    |
| Zn K    | 1.67    | 0.37    |
| Totals  | 100.00  |         |

**Table S4. The mass concentration based on the ICP-OES.**

| material     | Ca (mg/L) | Mn (mg/L) |
|--------------|-----------|-----------|
| CNT-CaMO-0.5 | 0.918     | 44.93     |
| CNT-CaMO-1   | 1.134     | 45.98     |
| CNT-CaMO-2   | 1.366     | 38.68     |
| CNT-CaMO-3   | 1.79      | 43.33     |
| CNT-CaMO-5   | 2.58      | 42.4      |



## Reference

- S1 M. H. Alfaruqi, J. Gim, S. Kim, J. Song, D. T. Pham, J. Jo, Z. Xiu, V. Mathew, J. Kim, *Electrochem. Commun.* 2015, **60**, 121.
- S2 J. Huang, Z. Wang, M. Hou, X. Dong, Y. Liu, Y. Wang, Y. Xia, *Nat. Commun.* 2018, **9**, 2906.
- S3 B. Wu, G. Zhang, M. Yan, T. Xiong, P. He, L. He, X. Xu, L. Mai, *Small*, 2018, **14**, 1703850.
- S4 N. Qiu, H. Chen, Z. Yang, S. Sun, Y. Wang, *Electrochim. Acta*, 2018, **272**, 154–160.
- S5 G. Fang, C. Zhu, M. Chen, J. Zhou, B. Tang, X. Cao, X. Zheng, A. Pan, S. Liang, *Adv. Funct. Mater.*, 2019, **29**, 1808375.
- S6 T. J. Sun, Q. S. Nian, S.B. Zheng, J. Q. Shi, Z. L. Tao, *Small*, 2020, **16**, 2000597.
- S7 A. X. Huang, W. J. Zhou, A. R. Wang, M. F. Chen, J. Z. Chen, Q. H. Tian, J.L. Xu, *Appl. Surf. Sci.* 2021, **545**, 149041.
- S8 L. Chen, Z. Yang, H. Qin, X. Zeng, J. Meng, *J. Power Sources*, 2019, **425**, 162-169.
- S9 J. Wang, J. G. Wang, H. Liu, C. Wei, F. Kang, *J. Mater. Chem. A*, 2019, **7**, 13727–13735.
- S10 H. Zhang, Q. Liu, J. Wang, K. Chen, D. Xue, J. Liu, X. Lu, *J. Mater. Chem. A*, 2019, **7**, 22079-22083.
